# Supplementary material
Source: Springer Nature journal article supplement (https://www.springermedizin.de/resource/supplementary/13033_2011_119_MOESM1_ESM.pdf/9651912)
Supplement: MOESM1 [file 9651912]

**Initial contacts to the  
casualty clinics  
registered by nurses  
(the Watchtower log)**

All contacts to  
the casualty clinics  
n=28527

Contacts related to substance  
misuse/mental illness  
n=715 (2.5%)

First action GP  
consultation/home-visit/  
emergency call-out  
n=18557

First action GP consultation/  
home-visit/emergency call-out  
related to substance  
misuse/mental illness  
n=342 (1.8%)

**Consultations/home-visits/  
emergency call-outs  
registered by the GPs  
(the GP generated log)**

Consultations/home-visits/  
emergency call-outs  
n=9487

Consultations/home-visits/  
emergency call-outs related to  
substance misuse/mental illness  
n=887 (9.3%)
